# Diverse and abundant viruses exploit conjugative plasmids

Natalia Quinones-Olvera<sup>1,2,3,\*</sup>, Siân V. Owen<sup>1,2,3,\*†</sup>, Lucy M. McCully<sup>1,2,3</sup>, Maximillian G. Marin<sup>1</sup>, Eleanor A. Rand<sup>1,2,3</sup>, Alice C. Fan<sup>1,2,3,4,5</sup>, Oluremi J. Martins Dosumu<sup>3,6</sup>, Kay Paul<sup>3,6</sup>, Cleotilde E. Sanchez Castaño<sup>3,6</sup>, Rachel Petherbridge<sup>5</sup>, Jillian S. Paul<sup>5,7</sup>, Michael Baym<sup>1,2,3,7,†</sup>

<sup>1</sup> Department of Biomedical Informatics, Harvard Medical School, Boston, MA 02115, USA

<sup>2</sup> Laboratory of Systems Pharmacology, Harvard Medical School, Boston, MA 02115, USA

<sup>3</sup> Department of Microbiology, Harvard Medical School, Boston, MA 02115, USA

<sup>4</sup> Boston University, Boston, MA 02215, USA

<sup>5</sup> Department of Systems Biology, Harvard Medical School, Boston, MA 02115, USA

<sup>6</sup> Roxbury Community College, Boston, MA, 02120, USA

<sup>7</sup> Broad Institute of MIT and Harvard, Cambridge, MA 02142, USA

\* Equal contribution

† To whom correspondence should be addressed: [sianvictoriaowen@gmail.com](mailto:sianvictoriaowen@gmail.com), [baym@hms.harvard.edu](mailto:baym@hms.harvard.edu)

---

**Viruses exert profound evolutionary pressure on bacteria by interacting with receptors on the cell surface to initiate infection. While the majority of bacterial viruses, phages, use chromosomally-encoded cell surface structures as receptors, plasmid-dependent phages exploit plasmid-encoded conjugation proteins, making their host range dependent on horizontal transfer of the plasmid. Despite their unique biology and biotechnological significance, only a small number of plasmid-dependent phages have been characterized. Here we systematically search for new plasmid-dependent phages using a targeted discovery platform, and find that they are in fact common and abundant in nature, and vastly unexplored in terms of their genetic diversity. Plasmid-dependent tectiviruses have highly conserved genetic architecture but show profound differences in their host range which do not reflect bacterial phylogeny. Finally, we show that plasmid-dependent tectiviruses are missed by metaviromic analyses, showing the continued importance of culture-based phage discovery. Taken together, these results indicate plasmid-dependent phages play an unappreciated evolutionary role in constraining horizontal gene transfer.**

---

1 Viral infections pose a constant threat to the majority of life on Earth<sup>1,2</sup>. Viruses recognize their hosts by interacting  
2 with structures (receptors) on the cell surface<sup>3</sup>. For viruses that infect bacteria (phages), these receptors are usually  
3 encoded on the chromosome, and are part of core cellular processes including transporter proteins or structurally  
4 integral lipopolysaccharides<sup>4</sup>. However, certain mobile genetic elements such as conjugative plasmids also contribute  
5 to the cell surface landscape by building secretory structures (e.g. conjugative pili) which enable them to transfer into  
6 neighboring bacterial cells<sup>5,6</sup>. Plasmid-dependent phages (PDPs) have evolved to use these plasmid-encoded structures  
7 as receptors, and can only infect plasmid-containing bacteria<sup>7</sup>. However, conjugative plasmids can transmit between  
8 distantly related cells, creating new phage-susceptible hosts by horizontal transfer of receptors<sup>8</sup>.

9 All previously known PDPs belong to unusual ‘non-tailed’ groups of phages, some of which have more in common  
10 with eukaryotic viruses than the ‘tailed’ phages that make up the majority of bacterial virus collections<sup>9,10</sup>. This includes  
11 the dsDNA alphatectiviruses, and members of the ssDNA inoviruses and +ssRNA fiersviruses. The handful of known  
12 PDPs have had profound impacts in molecular biology, enabling phage display technology<sup>11</sup> (F plasmid-dependent  
13 phage M13), and *in vivo* RNA imaging<sup>12</sup> (F plasmid-dependent phage MS2). PDPs have also aided in our understanding  
14 of the origin of viruses: tectiviruses are thought to represent ancient ancestors to adenoviruses<sup>13</sup>.

15 Predation by PDPs exerts strong selection on bacteria to lose conjugative plasmids or mutate/repress conjugation  
16 machinery such as the pilus<sup>14–17</sup>. As antibiotic resistance genes are frequently carried and spread by conjugative  
17 plasmids<sup>18–22</sup>, selection against plasmid carriage functionally selects against antibiotic resistance in many instances.  
18 The extent to which this is a significant evolutionary pressure on antibiotic resistance depends on how frequent these  
19 phages are in nature.

20 Despite the remarkable properties of these phages and their intriguing association with conjugative plasmids, only a  
21 handful of PDPs exist in culture. In the 1970s–80s at least 39 different PDPs were reported targeting 17 different plasmid  
22 types (classified by “incompatibility” groups)<sup>7</sup>. However, most of these reports predated the era of genome sequencing,  
23 and to our knowledge, most of the reported PDPs have been lost to science. Here we report that PDPs are not rare  
24 biological oddities, but rather a common, pervasive predator of conjugative plasmids. Using a targeted discovery assay,  
25 we find 64 new PDPs, dramatically expanding the known diversity of these phages. Moreover, we find that despite  
26 having been missed by metagenomic surveys, diverse PDPs are abundant and readily isolated from the environment.

## 27 Co-culture enables direct discovery of plasmid-dependent phages

28 Almost all known plasmid-dependent phages were serendipitously identified by laborious retroactive screening of large  
 29 phage collections that were isolated on bacteria with native conjugative plasmids<sup>23</sup>. In order to directly assess the  
 30 abundance and diversity of PDPs in the environment, we set out to develop a targeted isolation approach. The  
 31 challenge of targeted isolation is discriminating PDPs, in a direct, non-labor-intensive way, from other phages that  
 32 depend on species-specific receptors (so-called “somatic” phages).

33 To differentiate PDPs, we co-cultured a pair of distinct bacteria sharing the same plasmid. As PDPs use the conjugative  
 34 proteins produced by conjugative plasmids as receptors, their host range mirrors plasmid host range, and typically  
 35 crosses bacterial genera. We selected a known PDP, the Alphatectivirus PRD1, which depends on IncP group  
 36 conjugative plasmids and can infect the phylogenetically distant bacteria *Salmonella enterica* and *Pseudomonas putida*  
 37 provided they contain an IncP plasmid, in this case RP4. We made a modification to the traditional phage plaque  
 38 assay, by co-culturing these strains with differential fluorescent tags together in the same soft-agar lawn. After applying  
 39 dilutions of phages, the phenotype of the PDP PRD1, which efficiently killed both fluorescently labeled strains on the  
 40 lawn (resulting in no fluorescent signal) was immediately discernible from species-specific phage 9NA (infecting *S.*  
 41 *enterica*) and SVOΦ44 (infecting *P. putida*) (Figure 1a). This observation formed the basis of the targeted phage  
 42 discovery method we termed “Phage discovery by coculture” (Phage DisCo) (Figure 1b).

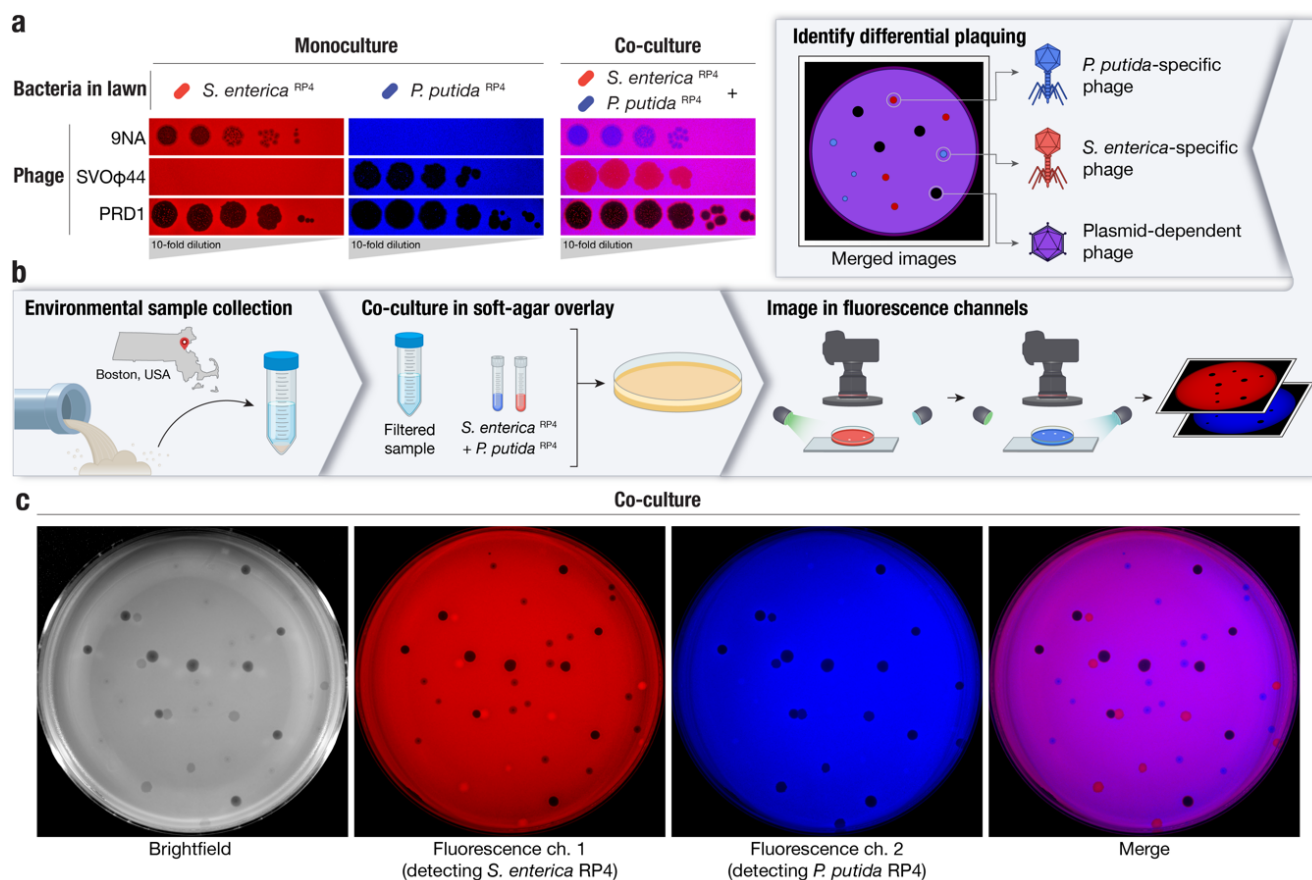

43 **Figure 1 | A method for systematic discovery of plasmid-dependent phages by fluorescence assisted co-culture (Phage DisCo)** **a**, Comparison  
 44 between monocultured lawns and a co-cultured lawn. All images show merged GFP and mScarlet fluorescence channels (GFP shown in blue for  
 45 visualization purposes). In monocultured lawns with exclusively *S. enterica*<sup>RP4</sup> (red) or *P. putida*<sup>RP4</sup> (blue), only plasmid-dependent phage PRD1  
 46 and the appropriate species-specific phages (*S. enterica* phage 9NA or *P. putida* phage SVOΦ44) generate plaques. In the co-culture lawn (magenta,  
 47 showing the overlap of both bacterial hosts), the species-specific phages form plaques on one of the species while plasmid-dependent phage PRD1  
 48 forms plaques on both species. **b**, Schematic of the Phage DisCo method and screening strategy. Environmental samples were collected from around  
 49 Boston, USA, and processed into a co-culture lawn with two plasmid-carrying bacterial hosts labelled with different fluorescent markers. After  
 50 incubation, the plates were imaged in both fluorescence channels. The merged image was then used to distinguish species specific phages (forming  
 51 red or blue plaques) from plasmid-dependent phages (forming dark plaques) **c**, Imaging of co-cultured lawn with white light or fluorescent light  
 52 channels, with approximately equimolar concentrations of phages shown in (b) to simulate a screening plate from an environmental sample  
 53 containing plasmid-dependent and species-specific phages. Individual plaques are clearly discernible as 9NA (blue plaques), SVOΦ44 (red plaques),  
 54 and PRD1 (dark plaques).

55 To directly isolate PDPs dependent on the RP4 plasmid using Phage DisCo, environmental samples containing putative  
56 PDPs can be mixed together with fluorescently labelled *S. enterica* and *P. putida* strains containing the conjugative  
57 plasmid RP4 (Figure 1b). After growth of the bacterial lawn, phages are immediately identifiable by the fluorescence  
58 phenotype of their plaques: *P. putida* phages appear as red plaques where only *S. enterica* RP4 (red) is able to grow,  
59 *S. enterica* phages present as blue plaques where only *P. putida* RP4 (blue) is able to grow, and PDPs make colorless  
60 plaques where both bacteria in the lawn are killed (Figure 1b). As a proof of principle, we mixed equimolar amounts  
61 of the test phages, 9NA, SVOΦ44 and PRD1, to simulate an environmental sample containing both species-specific  
62 phages and PDPs (Figure 1c). After incubation and growth of the bacteria in the lawn, the plate was photographed  
63 using a custom fluorescence imaging setup (Methods). Once the two fluorescent image channels were digitally merged,  
64 all three phages were easy to identify by fluorescence phenotype, and importantly, the PRD1 plaques could be easily  
65 discerned from the plaques made by the two species-specific phages.

## 66 **Plasmid-dependent tectiviruses from a limited geographic area fully encompass the previously known** 67 **global diversity**

68 Having established the efficacy of the method, we set out to look for PDPs in environmental samples using Phage  
69 DisCo. We chose to focus on phages depending on conjugative plasmids of the IncP incompatibility group, because  
70 only a handful of these phages have been described<sup>7</sup>, and they mostly belong to an unexplored family of lipid-  
71 containing phages, the Tectiviridae<sup>24</sup>. IncP plasmids are also associated with extensive antibiotic resistance gene cargo  
72 and are frequently isolated from environmental <sup>25</sup>. The six known IncP-dependent tectiviruses (alphatectiviruses) are  
73 quite closely related despite being isolated from across the globe.

74 We discovered 51 novel plasmid-dependent phages (Figure 2a), using Phage DisCo with IncP plasmid RP4 to screen  
75 samples collected from compost, farm waste and wastewater in the Greater Boston area (Massachusetts, USA). All 51  
76 discovered PDPs belong to the *Alphatectivirus* genus and are related to Enterobacteriophage PRD1. We adopted a  
77 naming system using the prefix “PRD” together with a color-based identifying name (e.g. PRDaquamarine,  
78 Supplementary Table S1). Surprisingly, despite our sampling being limited to a small geographical area and short time  
79 frame, the phages we isolated represented vastly more diversity than the six previously known plasmid-dependent  
80 tectiviruses that were isolated across multiple continents, suggesting these phages are greatly under sampled. We  
81 estimate our collection expands the genus *Alphatectivirus* from two species (PRD1 and PR4) to 12, as determined by  
82 pairwise nucleotide identity of all Alphatectiviruses, including the six previously known Alphatectiviruses and our 51  
83 new isolates (Figure S1a) (species cut-off <95% nucleotide identity).

84 Additionally, by querying genome databases we identified one published tectivirus genome, *Burkholderia phage BCE1*,  
85 closely related to PRD1 by whole genome phylogeny (Figure 2b). As *Burkholderia sp.* are known hosts of IncP-type  
86 conjugative plasmids<sup>26</sup> we expect that the *Burkholderia cenocepacia* host used to isolate BCE1 carried such a plasmid  
87 (highlighting the serendipitous nature by which PDPs are often found) and we include BCE1 in our known plasmid-  
88 dependent tectivirus phylogeny.

89 While the 51 new plasmid-dependent tectiviruses greatly expands the known diversity of this group of phages we  
90 found that all the phages in our collection had perfectly conserved gene synteny (Figure S1b). Just like the previously  
91 known alphatectiviruses, they have no accessory genome and contain all 31 predicted coding genes of the PRD1  
92 reference genome, suggesting strong constraints on genomic expansion in this group of phages. However, they contain  
93 a large number of single nucleotide polymorphisms (SNPs) distributed across the genome (Figure 2c) and isolates  
94 ranged from 82.5% to 99% average pairwise nucleotide identity. Certain regions of the genome are highly associated  
95 with polymorphism, such as the center and C-terminus of the DNA polymerase gene. Two small genes, *XXXVII* and  
96 *XIX*, are especially associated with nucleotide polymorphisms across our genome collection. Interestingly, *XXXVII* (also  
97 called P37 or gp v) is the outer-membrane unit of a two-component spanin system thought to be responsible for fusion  
98 of the inner and outer membrane in the final stages of cell lysis<sup>27</sup>. Similarly, *XIX* is highly diverse across our collection,  
99 but its function as a ssDNA binding protein is redundant with the contiguous gene *XII* which is highly conserved. As  
100 plasmid-dependent tectiviruses are known to have a very broad host range dependent primarily on the presence of  
101 conjugative plasmids, we wondered whether the high diversity observed in specific genes might reflect specialization  
102 of some of the phages in our collection to infection of particular hosts.

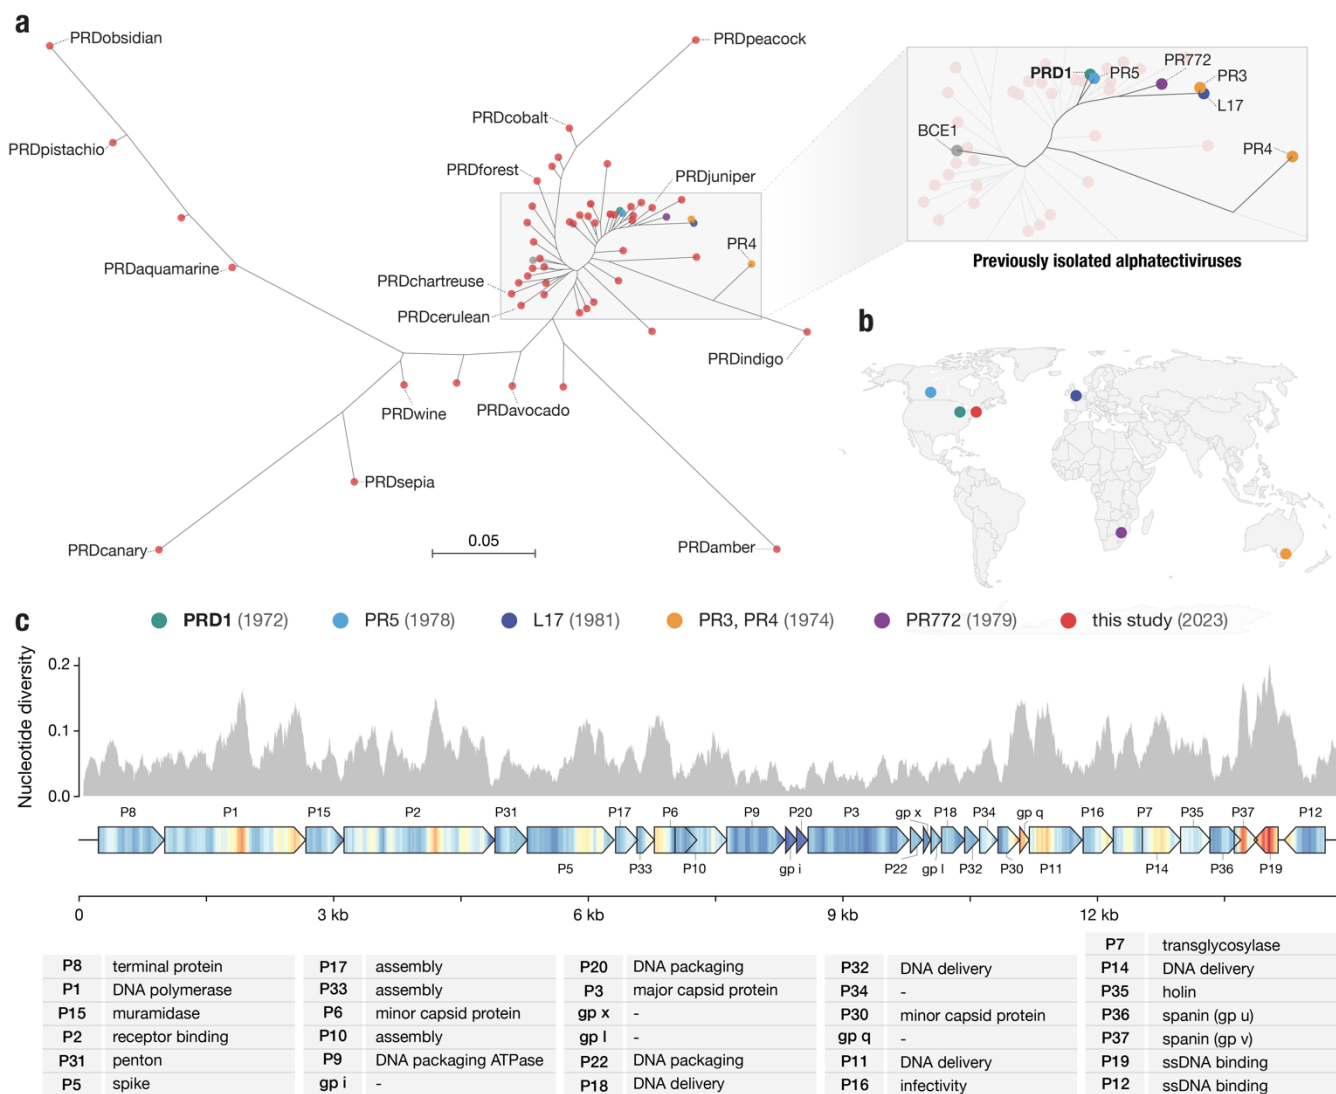

103 **Figure 2 | Targeted discovery of plasmid-dependent phages reveals unprecedented diversity and abundance** **a**, Maximum likelihood tree of all  
 104 known alphatectiviruses. (Generated with the whole genome, 14888 sites) Branch tips in red represent the novel phages isolated in this study. All  
 105 other colors (highlighted in the enlarged section of the tree) represent all previously known representatives of this phage group. **b**, Map showing the  
 106 site and isolation year of phages shown in (a). This collection includes and vastly expands the previously known diversity, despite being more  
 107 geographically and temporally constrained **c**, Nucleotide diversity across our collection of alphatectivirus genomes (n=51). The genome map is  
 108 colored to better display the nucleotide diversity value inside the gene body. Red coloration in the gene arrow symbols indicates high nucleotide  
 109 diversity and blue indicates low nucleotide diversity, values correspond to the histogram above.

## 110 **Plasmid-dependent tectiviruses show substantial phenotypic differences despite perfectly syntenic genomes with no accessory genes**

111 Plasmid-dependent tectiviruses (alphatectiviruses) exhibit a remarkably wide host range<sup>28</sup>, surpassing the host breadth  
 112 of any other described group of bacterial viruses. This ability comes in stark contrast with their small genome size,  
 113 perfect gene synteny, and lack of accessory genome. To explore the extent to which this constrained genomic diversity  
 114 leads to phenotypic variation in our collection of PDPs, we constructed a set of 13 hosts of diverse  
 115 Gammaproteobacteria, carrying the IncP conjugative plasmid pJKJ5 (indicated by <sup>P</sup>). We initially observed that PDPs  
 116 exhibited substantial differences in plaquing efficiency across hosts (Figure 3a). For example, while PRD1 is able to  
 117 plaque efficiently in all but one of the hosts, PRDcerulean can only efficiently form plaques on two *Pseudomonas*  
 118 hosts, representing a decrease in plaquing efficiency of at least four orders of magnitude in most other hosts. In contrast,  
 119 PRDchartreuse and PRDjuniper decrease their plaquing efficiency by a similar magnitude in *P. putida*<sup>P</sup> when compared  
 120 against *P. fluorescens*<sup>P</sup>. Notably, these isolates share >95% nucleotide identity to PRD1 (Figure 2a, Figure S1a) and  
 121 have no variation in gene content.  
 122

123 We quantified host preference differences of all 51 phages on all 13 bacterial species using a high throughput liquid  
 124 growth assay<sup>29</sup>. For each phage-host pair we calculated a liquid assay score (see Methods), which represents the growth  
 125 inhibition incurred by a fixed phage concentration, normalized as a percentage relative to the host growth in a phage-  
 126 free control (Figure 3b,c). We found that, consistent with earlier plaque assays (Figure 3a), the growth inhibition  
 127 phenotype was highly variable across phage isolates (Figure 3c). We identified more examples of phages such as  
 128 PRDmint and PRDcanary that displayed a host-specialist behavior, akin to that of PRDcerulean, while others, like  
 129 PRDobsidian and PRDamber appeared to robustly inhibit the growth of a wide range of hosts (host generalism).  
 130 Surprisingly, when looking at the data broadly, we found that neither the phage nor the host phylogenetic relationships  
 131 were strong predictors of host-preference. We speculate that these patterns might reflect the compositions of natural  
 132 polymicrobial communities containing IncP plasmids, which require PDPs to rapidly adapt to infect particular  
 133 assortments of taxonomically distant hosts.

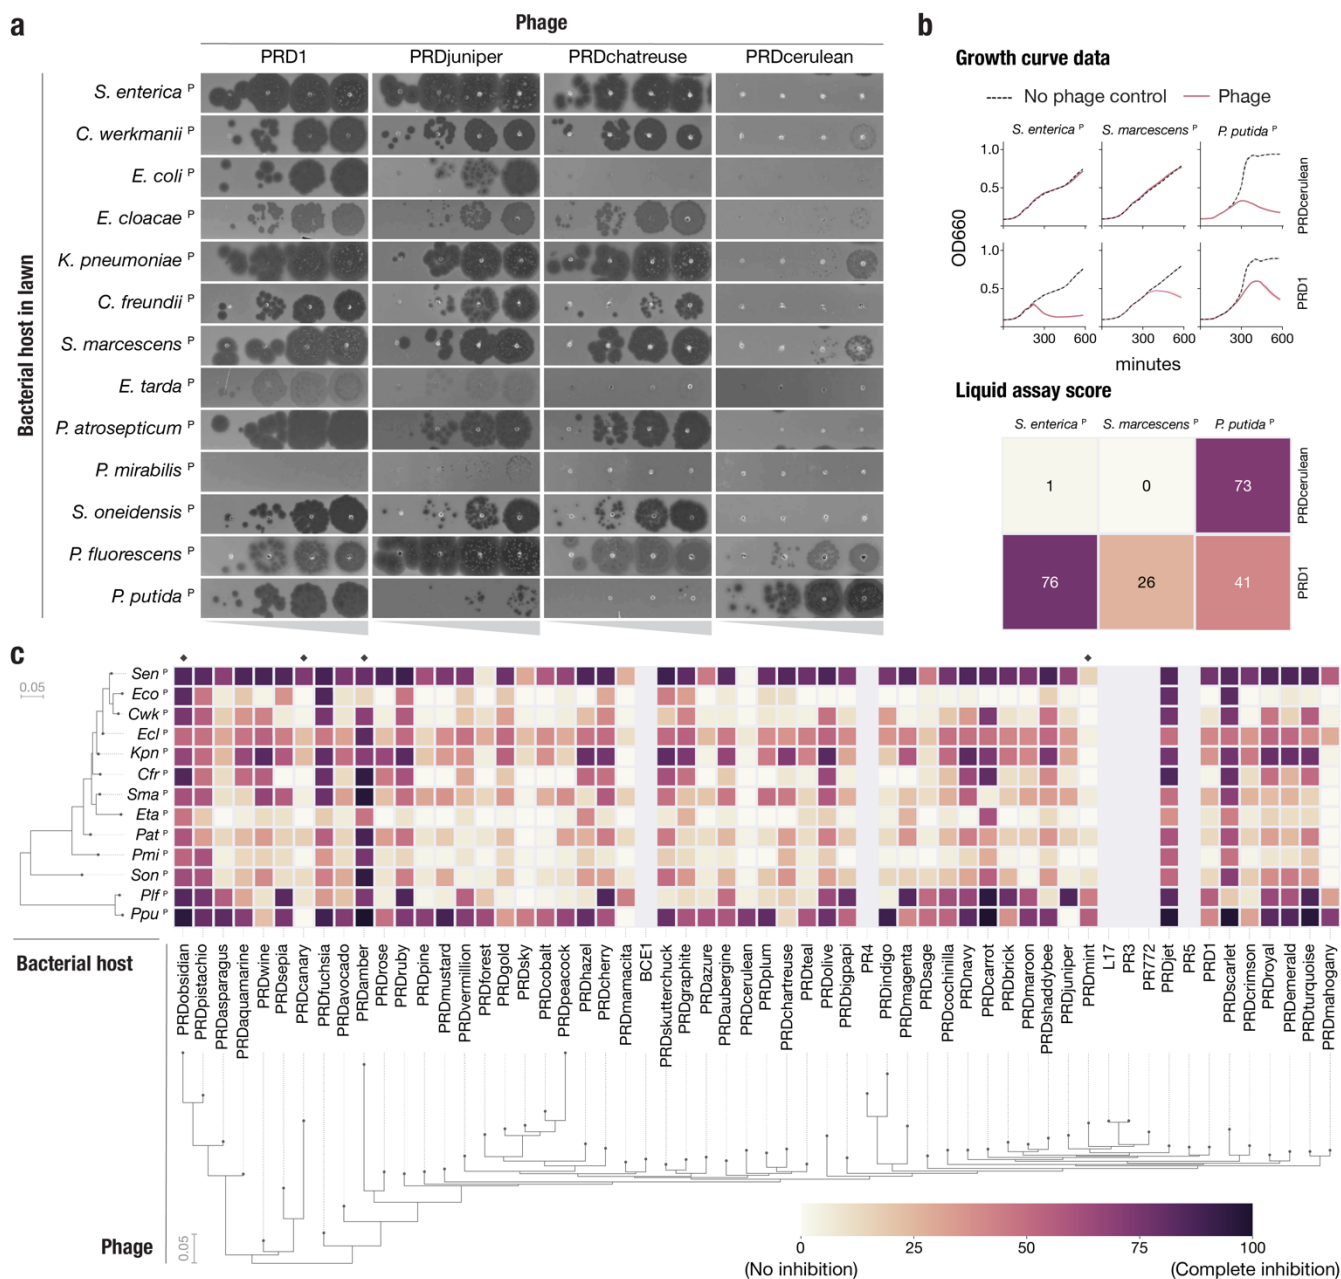

134 **Figure 3 | Plasmid-dependent tectiviruses have profoundly different host range preferences** **a**, Plaque assays of 10-fold dilutions of five novel  
 135 plasmid-dependent tectiviruses on diverse Gammaproteobacterial hosts containing the IncP conjugative plasmid pJK5 (indicated by <sup>P</sup>). The five  
 136 phages have large differences in plaquing efficiency on different host bacteria, despite being closely related by whole genome phylogeny (Figure  
 137 2a). **b**, Top shows examples of growth curve data for phages PRD1 and PRDcerulean on three host bacteria containing the pJK5 plasmid. Bottom  
 138 shows the same data, represented as liquid assay score. **c**, High throughput estimation of host range preferences for all the novel plasmid-dependent  
 139 tectiviruses in our dataset by liquid growth curve analysis. Maximum likelihood trees at the left and bottom indicate the inferred phylogenetic  
 140 relationships between phages (by whole genome phylogeny) and host bacteria (by 16S phylogeny). Grayed out rows are displayed for the 6 published

141 alphatectiviruses that we were unable to collect host preference data for. Black diamonds on the top of the heatmap highlight phages with host  
142 range preferences that are referenced in the text.

### 143 Metagenomic approaches fail to recover plasmid-dependent tectiviruses

144 Given the small number of plasmid-dependent tectiviruses known prior to this study (6, excluding BCE1) we were  
145 surprised by how easy it was to find these phages in our samples. However, a high absolute abundance of PDPs in  
146 hospital and municipal wastewater was recently reported in Denmark and Sweden<sup>30</sup>. To quantify their abundance, we  
147 used Phage DisCo to estimate the concentration of plasmid-dependent tectiviruses in fresh influent from two  
148 wastewater sites in Massachusetts, USA, relative to species-specific phages of *E. coli*, *S. enterica* and *P. putida* (Figure  
149 4a). Phages dependent on the IncP plasmid RP4 were present in wastewater at approximately 1000 phages per mL,  
150 the same order of magnitude as species-specific phages of *E. coli* at ~4000 phages per mL. Species-specific phages of  
151 *S. enterica* and *P. putida* were less abundant than IncP-plasmid-dependent phages, present at ~100 phages per mL and  
152 ~5 phages per mL respectively. Wastewater is considered one of the best samples to find *E. coli* and *S. enterica* phages,  
153 and therefore the comparable levels of IncP-plasmid-dependent phages shows that these phages are common, at least  
154 in built environments (human-made environments). The extent to which this abundance is a characteristic of phages  
155 dependent on IncP type plasmids as opposed to PDPs in general remains to be seen.

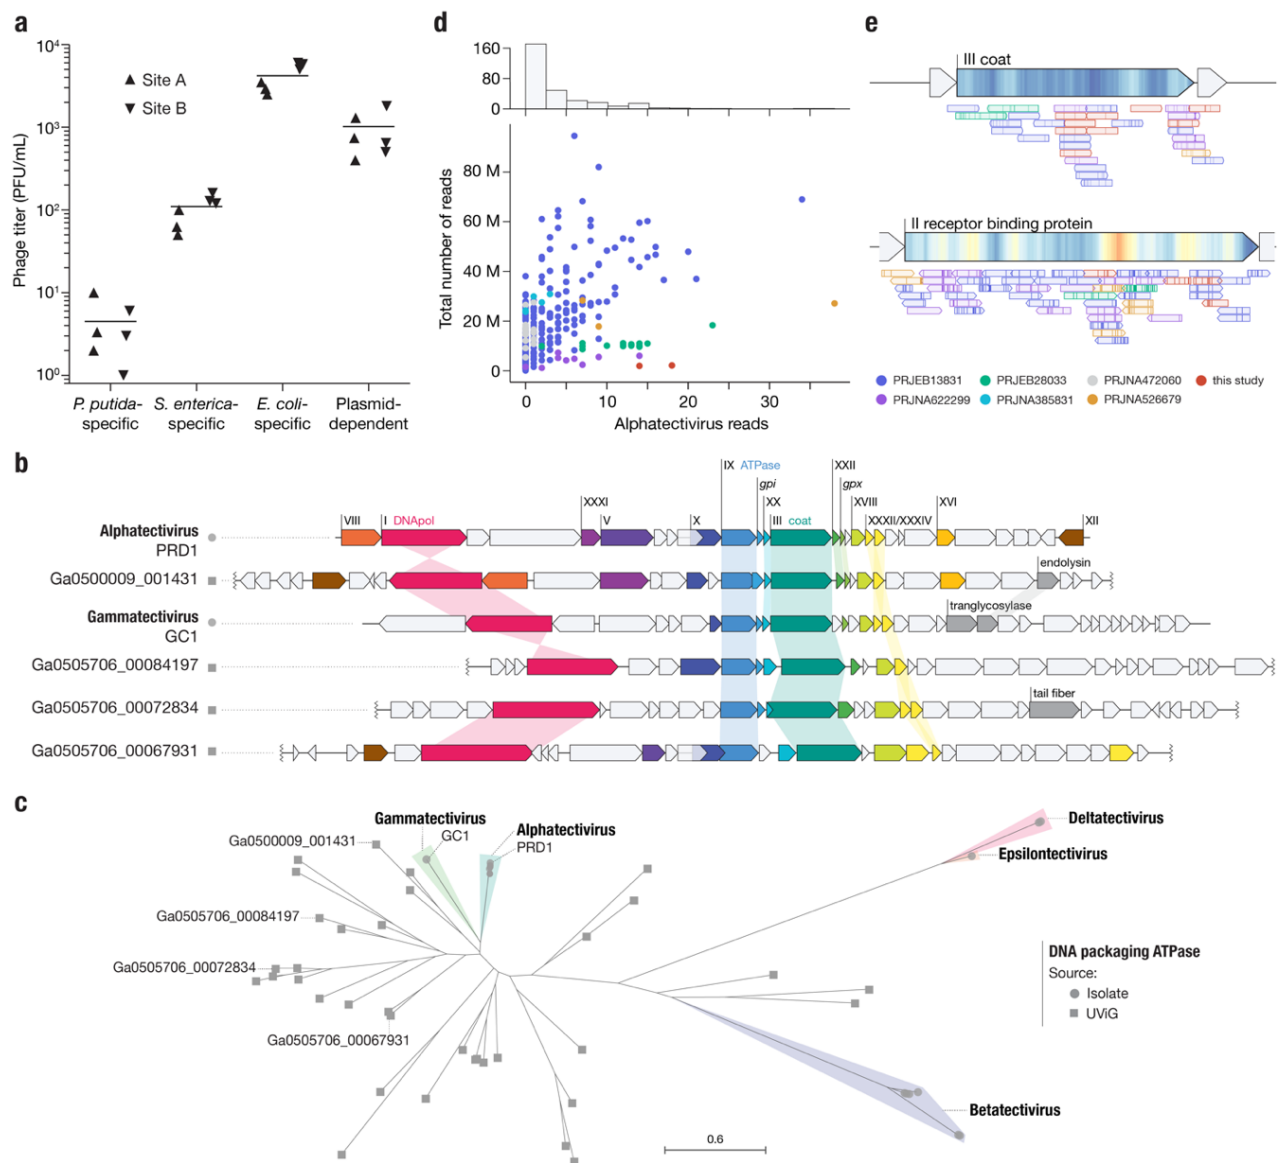

156 **Figure 4 | Alphatectiviruses are underrepresented in metagenomic assembled viromes** a, Abundance of plasmid-dependent phages in wastewater  
157 influent. Plasmid-dependent phages targeting the IncP plasmid RP4 are orders of magnitude more abundant than *P. putida*- and *S. enterica*- specific

158 phages, in two independent wastewater influent samples. **b**, Gene maps comparing Alphatectivirus PRD1 and Gammatectivirus GC1 against  
159 representative tectiviruses recovered from uncultivated viral genomes (UViGs). Colored genes represent homologs as detected by our protein models  
160 and shaded connectors represent proteins with >0.3 amino acid sequence identity. **c**, Maximum likelihood tree of the DNA packaging ATPase,  
161 including uncultivated tectiviruses (squares) and representatives of each genera of isolated tectiviruses (circles) **d**, Histogram and scatter plot of reads  
162 classified as being of alphatectiviral origin, against total number of reads in each metagenomic sample analyzed. Colors indicate different BioProjects  
163 from the SRA, full metadata can be found in Supplementary Table S1. **e**, Metagenomic reads mapped to regions of the PRD1 reference genome.  
164 ORFs are indicated with large arrows on top and colored as Figure 2d. Individual reads are represented by the smaller arrows and colored according  
165 to the dataset of origin (c), with mismatches marked as vertical lines.

166 Metagenomic-based viral discovery techniques have been extremely successful in expanding known viral diversity<sup>31-</sup>  
167 <sup>33</sup>. Although some studies have identified tectiviruses in metagenomic datasets<sup>34</sup> and metagenomic-assembled  
168 genomes<sup>35</sup>, alphatectiviruses have yet to be found in metagenomic analyses, at odds with the relatively high abundance  
169 of the plasmid-dependent alphatectiviruses in wastewater (Figure 4a). With the increasing availability of metagenomic  
170 datasets, we aimed to reexamine the presence of this group of phages in assembled collections. We queried the JGI  
171 IMG/VR database of uncultivated viral genomes and retrieved genomes with a match to the Pfam model PF09018,  
172 which corresponds to the PRD1 coat protein. This search retrieved a set of diverse genomes in which, using refined  
173 models built from our alphatectivirus collection, we identified homology to diagnostic tectivirus genes<sup>14</sup>, such as DNA  
174 polymerase (*I*), ATPase (*IX*), and delivery genes (*XVIII*, *XXXII*) in addition to the coat protein (*III*) used for the retrieval of  
175 these sequences (Figure 4b). However, none of the uncultivated viral genomes appear to belong to any of the pre-  
176 existing groups of isolated tectiviruses (Figure 4c). This result highlights the large unexplored diversity of the  
177 Tectiviridae family.

178 We tested if we could recover alphatectivirus sequences through metagenomic sequencing of samples where we knew  
179 they were present at high abundance (around 1000 PFU/mL) (Figure 4a). We processed our samples by filtration, and  
180 further concentrated the viral fraction by 100-fold (Methods), before performing DNA extraction and bulk sequencing.  
181 We classified our metagenomics dataset with Kraken2 (See Methods) and found that a very small proportion of the  
182 reads (>0.001%) could be assigned to the alphatectivirus taxonomic group, which would not be sufficient for assembly  
183 (Figure 4d). This implied that, despite there being no assembled alphatectiviruses in public databases, they may still  
184 be identifiable in raw reads.

185 We then looked at additional published wastewater metagenomic sequencing datasets, and processed samples from  
186 diverse projects, representing different sequencing depths, locations, and sample processing methods, comprising a  
187 total of 290 samples and more than 5 billion reads total (Supplementary Table 1). Over 75% of the samples contained  
188 5 or fewer reads assigned to alphatectiviruses. (Figure 4d) However, we found some alphatectivirus reads, primarily  
189 from the larger datasets, which directly mapped to the PRD1 reference genome (Figure 4e). The recovered reads  
190 appeared to be *bona fide* alphatectivirus sequences, as shown by the high mapping quality to the reference, a  
191 conservative approach that would fail to identify isolates with higher variation. Additionally, the diversity observed in  
192 the reads corresponds to the polymorphism landscape across our collection of isolates. For example, the coat protein,  
193 (gene III) is highly conserved across all tectiviruses and has very limited variation in the alphatectiviruses, while the  
194 receptor binding protein (gene II), a protein found exclusively in alphatectiviruses, has a much higher nucleotide  
195 diversity, reflected in the mapped metagenomic reads (Figure 4e). Taken together, no single dataset we analyzed  
196 contains enough reads to assemble a complete alphatectivirus genome. We hypothesize that a combination of a low  
197 relative abundance, small genome size, and highly polymorphic population might be responsible for the absence of  
198 alphatectiviruses in metagenomic assembled genome collections.

## 199 **Revisiting the F plasmid-dependent phage system uncovers a tailed plasmid-dependent phage**

200 Given the successful isolation of novel IncP-dependent phage diversity with the Phage DisCo method, we next tested  
201 how generalizable the method was to other conjugative-plasmid systems. Given that IncF plasmid-dependent phages  
202 are the most well studied group of PDPs, we wondered if novel diversity remained to be discovered. All known phages  
203 dependent on IncF plasmid receptors can be classified into two groups; +ssRNA phages belonging to the Fiersviridae  
204 family (e.g. MS2 and Qbeta), and filamentous ssDNA Inoviridae (e.g. M13). The archetypal IncF plasmid, the F plasmid  
205 of *E. coli*, has a narrower host range than IncP plasmids, so we changed the coculture hosts strains to *E. coli* and *S.*  
206 *enterica*. As *S. enterica* strains natively encode an IncF plasmid, we used a derivative that had been cured of all plasmids  
207 and prophages to mitigate any interference from these elements.

208 In a limited screen we discovered 13 novel IncF PDPs (Figure 5). Three belonged to the Emesvirus genus and were  
209 closely related to MS2 (average of 92% nucleic acid identity to MS2) (Figure 5a, Figure S1c). Four of the phages were  
210 related to Qbeta (average of 94% identity to Qbeta), in the Qubevirus genus (Figure 5b, Figure S1c). Five of the IncF  
211 PDPs were novel Inoviruses related to M13 (Figure 5c, Figure S1c). Though we observed less diversity than in the IncP

212 dependent phage screen, average nucleotide identity analysis suggests that one of the novel Inoviruses, FfLavender,  
 213 represents a new phage species (FfLavender is 88% identical to M13 at the nucleic acid level). Like the IncP-dependent  
 214 alphatectiviruses we isolated, all 12 of these new phages belonging to the Emesvirus, Qubevirus and Inoviruses genera  
 215 had perfectly conserved gene synteny and no novel gene content relative to the closest reference phages (MS2, Qbeta  
 216 and M13 respectively), suggesting that constrained genome content is a common feature of unrelated PDPs.

217 Finally, the final IncF plasmid-dependent phage we isolated, which we named FtMidnight, was found to have a dsDNA  
 218 genome, clearly distinguishing it from any known IncF plasmid-dependent phage. Plaque assay confirmed that  
 219 FtMidnight was dependent on the F plasmid (Figure 5d), and genome sequencing revealed it to be a 40,995 bp  
 220 putatively tailed phage, indicated by the presence of numerous tail-associated genes (Figure 5e). Transmission electron  
 221 microscopy confirmed that FtMidnight is a tailed phage resembling the morphological class of flexible tailed  
 222 siphoviruses (Figure 5f). To our knowledge, FtMidnight is the first tailed phage found to depend on a conjugative-  
 223 plasmid encoded receptor, demonstrating that novelty remains unsampled even in the well-studied F plasmid system.

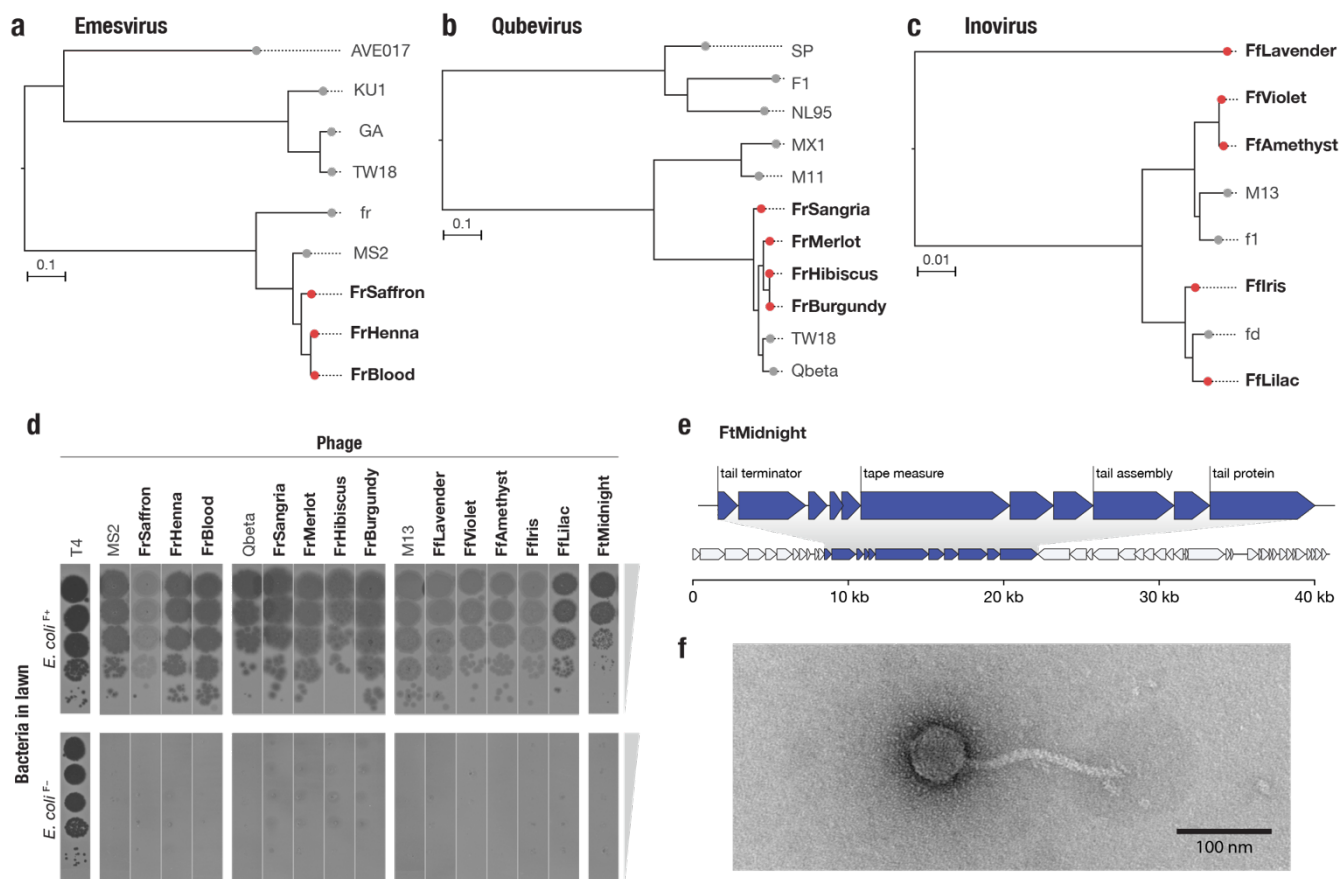

224 **Figure 5 | Phage DisCo uncovers new diversity even in the best-characterized (IncF) plasmid-dependent phage system** **a,b,c**, Whole genome  
 225 phylogenetic trees showing newly isolated (red) and known (gray) F dependent phages from the Emesvirus (RNA), Qubevirus (RNA) and Inovirus  
 226 (ssDNA) genera. **d**, Confirmatory plaque assay of all newly isolated phages on *E. coli* host with and without the F plasmid, confirming plasmid  
 227 dependency. **e**, Genome map of the novel IncF plasmid-dependent phage, FtMidnight, highlighting genes with predicted roles in tail formation  
 228 in blue. **f**, Transmission electron micrograph of FtMidnight, confirming it has siphovirus morphology (long non-contractile tail).  
 229

## 230 Discussion

231 Our finding that phages exploiting conjugative-plasmid encoded receptors are common and abundant in the urban  
 232 environment suggests that PDPs potentially act as an important and previously unquantified constraint on the spread  
 233 of conjugative plasmids in nature. With further study and discovery, PDPs could be exploited to manipulate the  
 234 dynamics of conjugative plasmid mobility, and thus the spread of antibiotic resistance genes, in high-risk environments.

235 The relatively high abundance of IncP PDPs in wastewater measured by culture-based methods contrasts with their  
 236 absence from metagenomic datasets, indicating a blind spot in bulk-sequencing based approaches to detect certain  
 237 groups of viruses. The biochemical properties of some viruses have been suggested to play a role in their depletion



238 from metagenomic datasets, such as DNA genomes with covalently bound proteins<sup>36</sup>. Though we cannot rule out a  
239 similar phenomenon is responsible for the lack of plasmid-dependent tectiviruses in metagenomic samples, we  
240 speculate that other factors might play a role, including the small genome size of PDPs relative to other viruses, low  
241 relative abundance, and high within sample sequence diversity interfering with consensus-assembly based methods.  
242 Still, the discrepancy points to the continued need for systematic culture-based viral discovery and method innovation.

243 Our discovery of FtMidnight, along with the significant expansion of known conjugative plasmid-dependent phage  
244 families, highlights the power of Phage DisCo to uncover unknown phage diversity. We anticipate this method to be  
245 generally applicable to identifying phages dependent on other conjugative plasmid systems, as well as translatable to  
246 further specialized phage discovery screens. The diversity and abundance of PDPs detected in the urban environment  
247 leads us to hypothesize that the interplay between phages and conjugative plasmids, both selfish genetic elements,  
248 may be driving the diversification of the conjugation systems mediating horizontal gene transfer in bacteria. This work  
249 represents a major first step in the exploration of this important group of phages, and much remains to be discovered  
250 about their ecology and biology, including how they interact with the plethora of defense systems present in bacteria<sup>37</sup>.

## 251 Methods

### 252 Strains and growth conditions

253 Details of all bacterial strains, plasmids, phages and primers used and constructed in this study are available in  
254 Supplementary Table S1. Unless stated otherwise, bacteria were grown at 37 °C or 30 °C in autoclaved LB<sup>Lennox</sup> broth  
255 (LB: 10 g/L Bacto Tryptone, 5 g/L Bacto Yeast Extract, 5 g/L NaCl) with aeration (shaking 200 rpm) or on LB agar plates,  
256 solidified with 2% Bacto Agar at 37°C or 30 °C. Salt-free LBO media contained 10 g/L Bacto Tryptone, 5 g/L Bacto  
257 Yeast Extract. When required antibiotics were added at the following concentrations: 50 µg/mL kanamycin monosulfate  
258 (Km), 100 µg/mL ampicillin sodium (Ap), 20 µg/mL tetracycline hydrochloride (Tc), 30 µg/mL trimethoprim (Tm), 20  
259 µg/mL chloramphenicol (Cm) and 20 µg/mL gentamicin sulfate (Gm).

### 260 Phage replication

261 Replication host strains for all phages used in this study are detailed in Supplementary Table S1. High titer phage stocks  
262 were produced by adding ~10<sup>5</sup> Plaque Forming Units (PFU) to exponential phase cultures at approximately OD<sub>600</sub> 0.1,  
263 and infected cultures were incubated for at least 3 hours at 37 °C (with aeration). Phage lysates were spun down  
264 (10,000 X g, 1 min) and supernatants were filter-sterilized with 0.22 µm, syringe filters. Phage lysates were serial-  
265 diluted (decimal dilutions) with SM buffer and plaque forming unit (PFU) enumeration was performed by double-layer  
266 overlay plaque assay<sup>38</sup>, as follows. Bacterial lawns were prepared with stationary phase cultures of the host strains,  
267 diluted 40 times with warm top agar (0.5 % agar in LB, 55 °C). The seeded top agar was poured on LB 2% agar bottom  
268 layer: 3 mL for 8.6 cm diameter petri dishes or 5 mL for 8.6 cm x 12 cm rectangular petri dishes. When required,  
269 antibiotics were added to the top agar.

### 270 Plasmid construction

271 The F plasmid from strain SVO150 was modified via recombineering to encode a *gfp* locus and kanamycin resistance  
272 locus (*aph*) for selection (*FΔfinO::aph-Plac-gfp*). Briefly, SVO150 was electroporated with the pSIM5tet recombineering  
273 plasmid (Supplementary Table S1), and the native IS3 interrupted *finO* locus was replaced with the *aph-Plac-gfp*  
274 cassette from pJKK5 using primers NQO2\_9 and NQO2\_12 as described (Koskiniemi et al., 2011). The replaced region  
275 was amplified with primers NQO2\_5 and NQO2\_6 and sent for Sanger sequencing to confirm the correct replacement.

### 276 Strain construction

277 For differential identification of plaques in coculture and transconjugant selection, constitutive *sgfp2\** or *mScarlet-1*  
278 loci along with a chloramphenicol resistance locus were added to *E. coli*, *S. enterica* and *P. putida* strains  
279 (Supplementary Table S1). Tn7 transposons from pMRE-Tn7-145 and pMRE-Tn7-152 were introduced into the *att<sup>tn7</sup>*  
280 site via conjugation from an auxotrophic *E. coli* donor strain as previously described<sup>39</sup>.

281 The RP4 plasmid was introduced into chromosomally tagged *S. enterica* and *P. putida* via conjugation using the BL103  
282 donor strain. Overnight liquid cultures of donor and recipient strains were mixed at a 1:10 (donor:recipient) ratio and  
283 concentrated into a volume of 20 µl by centrifugation. The cell slurry was transferred to the top of a 12 mm, 0.45 µm  
284 nitrocellulose membrane on the surface of an LB agar plate for 4 hours at temperature optimal for the recipient strain  
285 (see Supplementary Table S1) to permit conjugation. Transconjugants were selected by plating on LB supplemented  
286 with chloramphenicol and kanamycin. For *FΔfinO::aph-Plac-gfp*, a plasmid and prophage-cured *S. enterica* strain  
287 (SNW555, D23580 ΔΦ ΔpSLT-BT ΔpBT1 ΔpBT2 ΔpBT3<sup>40</sup>) was used to mitigate any interference from the IncF  
288 *Salmonella* virulence plasmid (pSLT) and native prophages. The *FΔfinO::aph-Plac-gfp* plasmid was introduced into  
289 SNW55 and NQO62 via conjugation, exactly as described above.

290 For IncP-PDP host range experiments, the pJKK5 plasmid was transconjugated into *Pseudomonas putida* KT2440,  
291 *Pectobacterium atrosepticum* SCRI1043, *Shewanella oneidensis* MR1, *Serratia marcescens* ATCC 1388, *Enterobacter*  
292 *cloacae* ATCC 13047, *Pseudomonas fluorescens* Pf0-1, *Klebsiella pneumoniae* PCI 602, *Citrobacter werkmanii* IC19Y,  
293 *Citrobacter freundii* ATCC 8090, *Edwardsiella tarda* ATCC 15947, *Proteus mirabilis* BB2000 Δ*ugd* and *Salmonella*  
294 *enterica* serovar Typhimurium LT2 via the cross streak method. The pJKK5 plasmid contains *gfp* under the control of  
295 the *Plac* promoter, which results in derepressed fluorescence in non-*E. coli* (*lac* negative) hosts<sup>41</sup>. Additionally, the  
296 pJKK5 donor strain, NQO38, constitutively expresses *mCherry*, permitting easy identification of transconjugants  
297 without need for dual selection. Briefly, an overnight liquid culture of the donor strain NQO38 was applied vertically  
298 in a single streak down the center of an LB agar plate. Subsequently, an overnight liquid culture of a recipient strain  
299 was streaked horizontally across the plate, crossing over the donor streak. After incubation at the recipient optimal  
300 temperature, transconjugant colonies were purified on the basis of green fluorescence signal.

### 301 **Optimization of PDP detection by fluorescence-enabled co-culture**

302 To validate the use of fluorescence-enabled co-culture to detect PDPs, a *S. enterica*-specific phage (9NA), a *P. putida*-  
303 specific phage (SVOΦ44) and an IncP plasmid-dependent phage were mixed at equal concentration (approximately  
304  $10^3$  PFU/mL). 100  $\mu$ L each of overnight liquid cultures of *S. enterica* LT2 *att<sup>Tn7</sup>::Tn7-mScarlet-I* + RP4 (NQO89) and *P.*  
305 *putida att<sup>Tn7</sup>::Tn7-SGFP2\** + RP4 (NQO80) was added to 3 mL molten LB top agar, along with 10  $\mu$ L of the phage  
306 mixture, and poured onto an LB agar plate. Plates were incubated overnight at 30 °C and then imaged in brightfield,  
307 red fluorescence channel, and green fluorescence channel using a custom imaging platform.

308 The custom imaging setup has a Canon EOS R camera with a Canon 100 mm lens with LEDs paired with excitation  
309 and emission filters (Green: 490-515 nm LED with 494 nm EX and 540/50 nm EM filters; Red: 567 nm LED with 562  
310 nm EX and 641/75 nm EM filters). Excitation filters are held in a Starlight express emission filter wheel. The camera,  
311 LEDs, and filter wheel are all controlled with custom software. Exposure times were 0.25 [green] and 0.5 s [red], with  
312 camera set to ISO-200 and f/3.5 as experimentally determined to maximize dynamic range. Imaging parameters were  
313 selected such that when green and red fluorescence channel images were merged, all three phages could be easily  
314 identified by fluorescent plaque phenotype: 9NA phages were visible as green plaques (only *P. putida att<sup>Tn7</sup>::Tn7-*  
315 *SGFP2\** + RP4 grows in these areas), SVOΦ44 plaques were visible as red plaques (only *S. enterica* LT2 *att<sup>Tn7</sup>::Tn7-*  
316 *mScarlet-I* + RP4 grows in these areas) and PRD1 plaques had no fluorescent signal (neither species grew in these  
317 areas). The red and green channels were separated from their raw images, their exposure linearly rescaled, and  
318 remapped to the red and blue channels respectively (to enhance visual color contrast). All image manipulations were  
319 done with scikit-image v0.17.2<sup>42</sup>.

### 320 **Collection and processing of environmental samples**

321 For phage isolation, wastewater primary influent from a total of 4 sites in Massachusetts were collected, along with  
322 soil, animal waste, and compost from farms, community gardens and parks close to Boston, USA. All samples were  
323 resuspended (if predominantly solid matter) in up to 25 mL of sterile water and incubated at 4 °C for 12 hours with  
324 frequent vortexing to encourage suspension and homogenization of viral particles. The resuspended samples were  
325 centrifuged at 4,000 x g for 30 minutes to pellet large biomass, and the clarified supernatant was filter sterilized using  
326 a 0.22  $\mu$ m vacuum driven filtration unit to remove bacteria. Filtered samples were stored at 4 °C. For metaviromic  
327 sequencing and phage enumeration in wastewater influent, two 100 mL samples were collected in September 2022  
328 from two separate intake sources of wastewater at a treatment plant in Boston, MA. Samples were processed by  
329 filtration as described above, except that processing was initiated immediately upon sample collection to avoid any  
330 sample degradation.

### 331 **Isolation of novel environmental PDPs by fluorescence enabled coculture**

332 For high throughput discovery of plasmid-dependent phages targeting the IncP plasmid pilus, co-culture lawns of *S.*  
333 *enterica* LT2 *att<sup>Tn7</sup>::Tn7-mScarlet-I* + RP4 (NQO 89) and *P. putida att<sup>Tn7</sup>::Tn7-SGFP2\** + RP4 (NQO80) were prepared  
334 as described earlier, except that 100  $\mu$ L of filtered environmental samples putative novel phages were added instead of  
335 the reference phages. In cases where phage load in samples was too high, and subsequent lawn did not grow uniformly  
336 due to widespread lysis, the amount of filtered sample added to the lawns was diluted 10-fold until single plaques  
337 were obtained. Putative PDP plaques (exhibiting no fluorescence) were sampled using sterile filter tips, diluted and re-  
338 plated for single plaques at least twice to ensure purity. For the IncF plasmid targeting phages, the procedure was the  
339 same, except that strains SVO348 (*E. coli* MG1655 *att<sup>Tn7</sup>::mScatlet-I-gmR* + *FΔfinO::aph-gfp*) and NQO87 (*S. enterica*  
340 D23580  $\Delta\Phi$   $\Delta$ pSLT-BT  $\Delta$ pBT1  $\Delta$ pBT2  $\Delta$ pBT3+ *FΔfinO::aph-gfp*) were used in the lawns. The plasmid and prophage  
341 cured strain of *S. enterica* was used for the IncF-dependent phage screen to mitigate interference from the native  
342 *Salmonella* virulence plasmid (which belongs to incompatibility group F<sup>43</sup>) and prophages.

343 Once putative novel PDPs had been purified from environmental samples, 5  $\mu$ L drops of 10-fold dilutions were plated  
344 on lawns of isogenic plasmid free host strains (BL131, SVO126, SVO50 or SNW555) to confirm plasmid-dependency.  
345 We note that false positives (i.e plasmid independent phages that infected both species in the coculture) were  
346 occasionally obtained during the IncF PDP isolation, due to the phylogenetic proximity between *E. coli* and *S. enterica*,  
347 suggesting that use of more distinct host strains (if possible for the plasmid of interest) maximizes assay efficiency.

### 348 **Phage DNA and RNA extraction and sequencing**

349 Pure phage stocks that had undergone at least 2 rounds of purification from single plaques and had titers of at least  $10^9$   
350 PFU/mL were used for nucleic acid extraction. The Invitrogen Purelink viral RNA/DNA mini kit was used to extract  
351 genetic material from all phages according to manufacturer instructions. High absorbance ratios (260/280) 2.0-2.2  
352 were considered indicative of RNA phage genomes. To remove host material contamination, putative RNA samples

353 were incubated with DNase I (NEB) for 1 hour at 37 °C and inactivated afterwards with EDTA at a final concentration  
354 of 5 mM. RNA was reverse transcribed using SuperScript™ IV VILO™ (Invitrogen™) for first strand synthesis, per the  
355 manufacturer's instructions. Second strand synthesis was performed by incubating the cDNA with DNA Ligase, DNA  
356 Polymerase I, and RNase H in NEBNext® Second Strand Synthesis Reaction Buffer (NEB) at 16 °C for three hours.  
357 cDNA was then used in downstream library preparation. Additionally, as all known non-RNA IncF plasmid-dependent  
358 phages have ssDNA genomes which are incompatible with tagmentation-based library preparation, any putative DNA  
359 sample from IncF plasmid-dependent phages was subjected to second strand synthesis as described above. Illumina  
360 sequencing libraries of the DNA and cDNA samples were prepared as previously described<sup>44</sup>. Sequencing was carried  
361 out on the Illumina Novaseq or iSeq with 150 bp paired end cycles. The genetic composition (dsDNA vs ssDNA) for  
362 phage FtMidnight was inferred via fluorescence signal using the Quant-IT dsDNA kit (Invitrogen).

363 For metaviromic DNA extraction, 45 mL of freshly filtered influent from each of the two extraction sites was  
364 concentrated 100 X into 500 µl using 100 kDa molecular weight cut off centrifugal filter units (Amicon). Nucleic acids  
365 were extracted from 200 µl of concentrated filtrate, and sent to SeqCenter for library preparation and Illumina  
366 sequencing. Sample libraries were prepared using the Illumina DNA Prep kit and IDT 10 bp UDI indices, and  
367 sequenced on an Illumina NextSeq 2000, producing 2x151 bp reads.

### 368 **Phage genome assembly and annotation**

369 Sequencing reads were adapter trimmed (NexteraPE adapters) and quality filtered with Trimmomatic v.0.39<sup>45</sup>. For  
370 samples with very high read depth, filtered reads were subsampled with rasusa v.0.5.0<sup>46</sup> to an approximate 200x  
371 coverage to facilitate assembly. The reads were then assembled with Unicycler v.0.4.8<sup>47</sup>. The annotations from curated  
372 PRD1, MS2, Qbeta and M13 reference genomes were transferred to the resulting assemblies with RATT v.1.0.3<sup>48</sup> and  
373 manually curated for completion. Phage isolates with redundant genomes were removed from the analysis and all  
374 phages included in this study represent unique isolates. Reads are deposited in the NCBI Sequence Read Archive (SRA)  
375 (accessions pending) All accession numbers for previously published genomes and those generated in this study are  
376 listed in Supplementary Table S1.

### 377 **Nucleotide diversity**

378 To calculate nucleotide diversity among the alphatectiviruses, all the assembled isolates were aligned to the PRD1  
379 reference genome with minimap2 v2.24<sup>49</sup>. Resulting alignments were processed with bcftools v1.9<sup>50</sup> and samtools  
380 v1.6<sup>51</sup> to then calculate nucleotide diversity with vcftools v0.1.16<sup>52</sup> with a sliding window of size 100 bp. Results were  
381 plotted with seaborn v0.12.2<sup>53</sup> and matplotlib<sup>54</sup>. Novel species classifications were proposed where average pairwise  
382 nucleotide diversity was less than 95%<sup>55</sup>.

### 383 **Phage enumeration in wastewater by plaque assay**

384 Two freshly filtered wastewater influent samples were processed as previously described (See Collection and  
385 processing of environmental samples) and the concentration of phages in volumes of 10, 100 and 500 µm were  
386 enumerated by single host plaque assay on strains SVO50, BL131, and SVO126 and by fluorescence enabled co-  
387 culture plaque assay on NQO89 and NQO80. All phage enumeration was performed with 3 biological replicates.  
388 Titers per mL were calculated and plotted for both sites.

### 389 **Determination of phage host range**

390 Host range of the IncP-PDPs was assessed by traditional efficiency of plating (EoP) assay or by killing in liquid culture  
391 by OD<sub>660</sub> measurement, based on a previously described method<sup>29</sup>. All the phages were challenged against the  
392 following bacteria containing the pJK5 plasmid: *Pseudomonas putida* KT2440, *Pectobacterium atrosepticum*  
393 SCRI1043, *Shewanella oneidensis* MR1, *Serratia marcescens* ATCC 1388, *Enterobacter cloacae* ATCC 13047,  
394 *Pseudomonas fluorescens* Pf0-1, *Klebsiella pneumoniae* PCI 602, *Citrobacter werkmanii* IC19Y, *Citrobacter freundii*  
395 ATCC 8090, *Edwardsiella tarda* ATCC 15947, *Proteus mirabilis* BB2000  $\Delta$ ugd and *Salmonella enterica* serovar  
396 Typhimurium LT2. These hosts were chosen as they all showed some degree of susceptibility to IncP dependent phages  
397 when transconjugated with the pJK5 plasmid, indicating proper elaboration of the IncP pilus.

398 For the high throughput determination of host range, phages were normalized to a titer of 10<sup>7</sup> PFU/mL as measured in  
399 strain NQO36, with the exception of PRDchartreuse, PRDcanary, PRDjuniper, and PRDmamacita, which were  
400 normalized to the same titer in NQO37, due to their inability to replicate to high titers in NQO36. Growth curve  
401 experiments were set up in 96-well plates with each well containing 180 µL of bacterial culture at OD<sub>600</sub> of ~0.1 and  
402 20 µL of phage stock when appropriate, for a final concentration of 10<sup>6</sup> PFU/mL. They were grown in a plate reader  
403 (Tecan Sunrise™) for 10 hours with shaking, at the optimal temperature for the strain (see Supplementary Table S1),

404 measuring the optical density at 660nm, every 5 minutes. Each 96-well plate had a phage-free control, cell free control,  
405 and the strain-phage condition in triplicate. To calculate the liquid assay score of each host-phage pair we followed  
406 the method described previously<sup>29</sup>. Briefly, we calculate the area under the growth curve for each host-phage pair, as  
407 well as for its corresponding phage-free control grown in the same plate. The mean area under the curve value is then  
408 normalized as a percentage of the mean area under the curve in the phage-free control. Growth curves are plotted  
409 with shading representing the standard error. Liquid assays scores are plotted as a heatmap, and are vertically sorted  
410 according to the previously computed alphatectivirus tree and horizontally sorted according to a 16S tree of the  
411 bacterial hosts (See Supplementary Table S1)

#### 412 **Search and comparison of tectiviruses in metagenomic assembled genomes**

413 To collect metagenomic assembled genomes of tectiviruses, a search was performed in the JGI IMG/VR<sup>56</sup> for  
414 uncultivated viral genomes (UViGs) matching Pfam model PF09018<sup>57</sup>, which corresponds to the tectivirus capsid  
415 protein. The recovered assemblies were annotated with prokka v1.14.6<sup>58</sup> using the PHROGs database<sup>59</sup>. To refine these  
416 annotations, our large collection of alphatectiviruses was used to build protein alignments for each protein in the PRD1  
417 genome, using clustalo v1.2.4.<sup>60</sup> and manually curating them for quality. These alignments were then used to build  
418 hmm profile models with HMMER v3.3.1<sup>61</sup>, to search them against the collected tectivirus MAGs. A representative  
419 selection of annotated MAGs was selected and visualized with clinker v0.0.27<sup>62</sup> and colored to show homology.  
420 Shaded connectors represent proteins with >0.3 sequence identity, while annotations with the same color represent  
421 significant ( $p < 0.01$ ) homologs according to the HMMER search.

#### 422 **Search for alphatectiviruses in metagenomic reads**

423 Kraken2 v2.1.2<sup>63</sup> was used to search for the presence of alphatectiviruses reads in metagenomic datasets. A custom  
424 database was built by adding our new alphatectivirus assemblies to the default RefSeq viral reference library. With this  
425 database, a collection of reads from wastewater sequencing projects was searched. The SRA BioProject accession  
426 numbers and metadata of this collection can be found in Supplementary Table S1. The individual reads from each  
427 sequencing run that were classified as belonging to alphatectiviruses according to Kraken2 were extracted and mapped  
428 to the PRD1 reference genome with minimap2 v2.22. The resulting mapped reads were processed with samtools v1.6  
429 and visualized with IGV v2.11.4<sup>64</sup>.

#### 430 **Phylogenetic trees**

431 For the Alphatectivirus, Emesvirus, Qubevirus, and Inoviridae trees, previously published genomes and those collected  
432 in this study were aligned with clustalo v1.2.4. The resulting multiple sequence alignment was manually curated to  
433 ensure quality of the alignment. Trees were then built with iqtree v2.2.0.3<sup>65</sup> and phyml v3.2.0.<sup>66</sup>, and visualized with  
434 iTOL v6.7<sup>67</sup>. For the tectivirus ATPase tree, the amino acid sequences for protein P9 (ATPase) from all known  
435 tectiviruses were aligned with clustalo v1.2.4. This alignment was used to create an hmm profile model with HMMER,  
436 which was then used to search the amino acid sequences extracted from the annotated MAGs (see Search for  
437 tectiviruses in metagenomic assembled genomes). Significant hits were extracted and aligned to the model with  
438 HMMER. We also included in this alignment the previously metagenomic-assembled tectiviruses listed in Yutin et al.<sup>35</sup>  
439 and a selection of characterized representatives of the 5 tectivirus genera. A tree of the resulting ATPase alignment was  
440 built with phyml v3.2.0, and visualized with iTOL v6.7. All accession numbers of sequences used to build this tree are  
441 listed in Supplementary Table S1.

#### 442 **Electron microscopy**

443 Carbon grids were glow discharged using a EMS100x Glow Discharge Unit for 30 seconds at 25mA. High titer phage  
444 stocks were diluted 1:10 in water and 5  $\mu$ L was adsorbed to the glow discharged carbon grid for 1 minute. Excess  
445 sample was blotted with filter paper and the grids were washed once with water before staining with 1% uranyl acetate  
446 for 20 seconds. Excess stain was blotted with filter paper and the grids were air dried prior to examination with a Tecnai  
447 G2 Spirit BioTWIN Transmission Electron Microscope at the Harvard Medical School Electron Microscopy Facility.

#### 448 **Data and materials availability**

449 Raw sequencing reads have been deposited in the NCBI BioProject database under accession number PRJNA954020.  
450 Accession numbers for novel phage genomes generated in this study can be found in Supplementary Table S1. All  
451 raw data used in figures are available on a github repository:

452 [https://github.com/baymlab/2023\\_QuinonesOlvera-Owen](https://github.com/baymlab/2023_QuinonesOlvera-Owen)

453 All unique materials used are available from the authors on request.

454

455 **Code availability**

456 All code is available on a github repository:

457 [https://github.com/baymlab/2023\\_QuinonesOlvera-Owen](https://github.com/baymlab/2023_QuinonesOlvera-Owen)

458

459 **Acknowledgements**

460 We are grateful for the gifts of bacterial strains, plasmids, phages or wastewater from the labs of Uli Klümper, Catherine  
461 Putonti, George O'Toole, Karine Gibbs, Jay Hinton, Pamela Silver and Ameet Pinto. We thank the other instructors  
462 and students of the HMS Phages 2022 summer course: Thomas Bernhardt, Amelia McKitterick, Kate Hummels, Thomas  
463 Bartlett, Nawonh Chalres, Melanie Justice, Tosin Bademosi and Ahadu Molla, which was partially supported by the  
464 HHMI Science Education Alliance. NQO thanks the Marine Biological Laboratory at Woods Hole and all instructors  
465 from the 2019 Microbial Diversity course. Electron microscopy imaging and consultation were performed in the HMS  
466 Electron Microscopy Facility. Custom instrumentation was built with assistance from the Research Instrumentation core  
467 at Harvard Medical School. Computational work used the O2 cluster supported by the Research Computing Group at  
468 Harvard Medical School. This work was supported by the NIGMS of the National Institutes of Health (R35GM133700),  
469 the David and Lucile Packard Foundation, the Pew Charitable Trusts, and the Alfred P. Sloan Foundation. NQO  
470 acknowledges support from Consejo Nacional de Ciencia y Tecnología (CONACYT, México). ACF was supported in  
471 part by the NSF-Simons Center for Mathematical and Statistical Analysis of Biology at Harvard (award number  
472 #1764269), and the Harvard Quantitative Biology Initiative.

473 **Supplementary Materials**

474 Figure S1. a, Whole-genome pairwise nucleotide identity matrix comparing all known alphatectiviruses.  
475 Highlighted isolates represent proposed new species. b, Gene map comparison of all alphatectiviruses I  
476 isolated in this study, colors are as in (Figure 4b) c, Whole genome assemblies of IncF-dependent phages  
477 aligned to their corresponding reference genome. Grey area represents an aligned region, vertical lines  
478 represent SNPs relative to the reference, and capped vertical lines represent INDELS. Incomplete ends of  
479 the assembly are represented by horizontal lines.

480

481 Table S1. Excel spreadsheet listing all bacterial strains, plasmids, phages, primers and SRA datasets used in this  
482 study

## 483 References

- 484 1. Greene, S. E. & Reid, A. Viruses Throughout Life & Time: Friends, Foes, Change Agents: A Report on an  
485 American Academy of Microbiology Colloquium San Francisco // July 2013. (American Society for  
486 Microbiology, 2013).
- 487 2. Lefkowitz, E. J. et al. Virus taxonomy: the database of the International Committee on Taxonomy of Viruses  
488 (ICTV). *Nucleic Acids Res* 46, D708–D717 (2018).
- 489 3. Dimitrov, D. S. Virus entry: molecular mechanisms and biomedical applications. *Nat Rev Microbiol* 2, 109–122  
490 (2004).
- 491 4. Bertozzi Silva, J., Storms, Z. & Sauvageau, D. Host receptors for bacteriophage adsorption. *FEMS Microbiology*  
492 *Letters* 363, fnw002 (2016).
- 493 5. Waksman, G. From conjugation to T4S systems in Gram-negative bacteria: a mechanistic biology perspective.  
494 *EMBO reports* 20, e47012 (2019).
- 495 6. Goessweiner-Mohr, N., Arends, K., Keller, W. & Grohmann, E. Conjugation in Gram-Positive Bacteria.  
496 *Microbiology Spectrum* 2, 2.4.19 (2014).
- 497 7. Frost, L. S. Conjugative Pili and Pilus-Specific Phages. in *Bacterial Conjugation* (ed. Clewell, D. B.) 189–221  
498 (Springer US, 1993). doi:10.1007/978-1-4757-9357-4\_7.
- 499 8. Bottery, M. J. Ecological dynamics of plasmid transfer and persistence in microbial communities. *Curr Opin*  
500 *Microbiol* 68, None (2022).
- 501 9. Mäntynen, S., Sundberg, L.-R., Oksanen, H. M. & Poranen, M. M. Half a Century of Research on Membrane-  
502 Containing Bacteriophages: Bringing New Concepts to Modern Virology. *Viruses* 11, 76 (2019).
- 503 10. Wolf, Y. I. et al. Origins and Evolution of the Global RNA Virome. *mBio* 9, e02329-18 (2018).
- 504 11. Barderas, R. & Benito-Peña, E. The 2018 Nobel Prize in Chemistry: phage display of peptides and antibodies.  
505 *Anal Bioanal Chem* 411, 2475–2479 (2019).
- 506 12. George, L., Indig, F. E., Abdelmohsen, K. & Gorospe, M. Intracellular RNA-tracking methods. *Open Biology* 8,  
507 180104 (2018).
- 508 13. Koonin, E. V., Krupovic, M. & Yutin, N. Evolution of double-stranded DNA viruses of eukaryotes: from  
509 bacteriophages to transposons to giant viruses. *Ann. N.Y. Acad. Sci.* 1341, 10–24 (2015).
- 510 14. Jalasvuori, M., Friman, V.-P., Nieminen, A., Bamford, J. K. H. & Buckling, A. Bacteriophage selection against a  
511 plasmid-encoded sex apparatus leads to the loss of antibiotic-resistance plasmids. *Biology Letters* 7, 902–905  
512 (2011).
- 513 15. Colom, J. et al. Sex pilus specific bacteriophage to drive bacterial population towards antibiotic sensitivity.  
514 *Scientific Reports* 9, 12616 (2019).
- 515 16. Penttinen, R., Given, C. & Jalasvuori, M. Indirect Selection against Antibiotic Resistance via Specialized Plasmid-  
516 Dependent Bacteriophages. *Microorganisms* 9, 280 (2021).
- 517 17. Ojala, V., Laitalainen, J. & Jalasvuori, M. Fight evolution with evolution: plasmid-dependent phages with a wide  
518 host range prevent the spread of antibiotic resistance. *Evol Appl* 6, 925–932 (2013).
- 519 18. DelaFuente, J. et al. Within-patient evolution of plasmid-mediated antimicrobial resistance. 2022.05.31.493991  
520 Preprint at <https://doi.org/10.1101/2022.05.31.493991> (2022).
- 521 19. Anderson, R. M. The pandemic of antibiotic resistance. *Nature Medicine* 5, 147–149 (1999).
- 522 20. Getino, M. & de la Cruz, F. Natural and Artificial Strategies To Control the Conjugative Transmission of  
523 Plasmids. *Microbiology Spectrum* 6, 6.1.03 (2018).
- 524 21. Conlan, S. et al. Plasmid Dynamics in KPC-Positive *Klebsiella pneumoniae* during Long-Term Patient  
525 Colonization. *mBio* 7, e00742-16 (2016).
- 526 22. Weingarten, R. A. et al. Genomic Analysis of Hospital Plumbing Reveals Diverse Reservoir of Bacterial Plasmids  
527 Conferring Carbapenem Resistance. *mBio* 9, e02011-17 (2018).
- 528 23. Vinjé, J., Oudejans, S. J. G., Stewart, J. R., Sobsey, M. D. & Long, S. C. Molecular Detection and Genotyping of  
529 Male-Specific Coliphages by Reverse Transcription-PCR and Reverse Line Blot Hybridization. *Applied and*  
530 *Environmental Microbiology* 70, 5996 (2004).
- 531 24. Saren, A.-M. et al. A Snapshot of Viral Evolution from Genome Analysis of the Tectiviridae Family. *Journal of*  
532 *Molecular Biology* 350, 427–440 (2005).
- 533 25. Popowska, M. & Krawczyk-Balska, A. Broad-host-range IncP-1 plasmids and their resistance potential. *Frontiers*  
534 *in Microbiology* 4, (2013).
- 535 26. Brooks, L. E., Kaze, M. & Sistrom, M. Where the plasmids roam: large-scale sequence analysis reveals plasmids  
536 with large host ranges. *Microbial Genomics* 5, e000244 (2019).

- 537 27. Krupovič, M., Cvirkaitė-Krupovič, V. & Bamford, D. H. Identification and functional analysis of the Rz/Rz1-like  
538 accessory lysis genes in the membrane-containing bacteriophage PRD1. *Molecular Microbiology* 68, 492–503  
539 (2008).
- 540 28. Olsen, R. H., Siak, J.-S. & Gray, R. H. Characteristics of PRD1, a Plasmid-Dependent Broad Host Range DNA  
541 Bacteriophage. *Journal of Virology* 14, 689–699 (1974).
- 542 29. Xie, Y., Wahab, L. & Gill, J. J. Development and Validation of a Microtiter Plate-Based Assay for Determination  
543 of Bacteriophage Host Range and Virulence. *Viruses* 10, 189 (2018).
- 544 30. He, Z., Parra, B., Nesme, J., Smets, B. F. & Dechesne, A. Quantification and fate of plasmid-specific  
545 bacteriophages in wastewater: Beyond the F-coliphages. *Water Research* 227, 119320 (2022).
- 546 31. Nayfach, S. et al. A genomic catalog of Earth’s microbiomes. *Nature Biotechnology* 1–11 (2020)  
547 doi:10.1038/s41587-020-0718-6.
- 548 32. Roux, S. et al. Cryptic inoviruses revealed as pervasive in bacteria and archaea across Earth’s biomes. *Nat*  
549 *Microbiol* 4, 1895–1906 (2019).
- 550 33. Edgar, R. C. et al. Petabase-scale sequence alignment catalyses viral discovery. *Nature* 602, 142–147 (2022).
- 551 34. Strange, J. E. S., Leekitcharoenphon, P., Møller, F. D. & Aarestrup, F. M. Metagenomics analysis of  
552 bacteriophages and antimicrobial resistance from global urban sewage. *Sci Rep* 11, 1600 (2021).
- 553 35. Yutin, N., Bäckström, D., Ettema, T. J. G., Krupovic, M. & Koonin, E. V. Vast diversity of prokaryotic virus  
554 genomes encoding double jelly-roll major capsid proteins uncovered by genomic and metagenomic sequence  
555 analysis. *Virol J* 15, 67 (2018).
- 556 36. Kauffman, K. M. et al. A major lineage of non-tailed dsDNA viruses as unrecognized killers of marine bacteria.  
557 *Nature* 554, 118–122 (2018).
- 558 37. Bernheim, A. & Sorek, R. The pan-immune system of bacteria: antiviral defence as a community resource. *Nat*  
559 *Rev Microbiol* 18, 113–119 (2020).
- 560 38. Kropinski, A. M., Mazzocco, A., Waddell, T. E., Lingohr, E. & Johnson, R. P. Enumeration of bacteriophages by  
561 double agar overlay plaque assay. *Methods in molecular biology* (Clifton, N.J.) (2009) doi:10.1007/978-1-  
562 60327-164-6\_7.
- 563 39. Schlechter, R. O. et al. Chromatic Bacteria – A Broad Host-Range Plasmid and Chromosomal Insertion Toolbox  
564 for Fluorescent Protein Expression in Bacteria. *Frontiers in Microbiology* 9, (2018).
- 565 40. Owen, S. V. et al. Prophages encode phage-defense systems with cognate self-immunity. *Cell Host & Microbe*  
566 (2021).
- 567 41. Klümper, U. et al. Broad host range plasmids can invade an unexpectedly diverse fraction of a soil bacterial  
568 community. *The ISME Journal* 9, 934–945 (2015).
- 569 42. van der Walt, S. et al. scikit-image: image processing in Python. *PeerJ* 2, e453 (2014).
- 570 43. Villa, L., García-Fernández, A., Fortini, D. & Carattoli, A. Replicon sequence typing of IncF plasmids carrying  
571 virulence and resistance determinants. *Journal of Antimicrobial Chemotherapy* 65, 2518–2529 (2010).
- 572 44. Baym, M. et al. Inexpensive Multiplexed Library Preparation for Megabase-Sized Genomes. *PLOS ONE* 10,  
573 e0128036 (2015).
- 574 45. Bolger, A. M., Lohse, M. & Usadel, B. Trimmomatic: a flexible trimmer for Illumina sequence data.  
575 *Bioinformatics* 30, 2114–2120 (2014).
- 576 46. Hall, M. Rasusa: Randomly subsample sequencing reads to a specified coverage. *JOSS* 7, 3941 (2022).
- 577 47. Wick, R. R., Judd, L. M., Gorrie, C. L. & Holt, K. E. Unicycler: Resolving bacterial genome assemblies from short  
578 and long sequencing reads. *PLoS Comput Biol* 13, e1005595 (2017).
- 579 48. Otto, T. D., Dillon, G. P., Degraeve, W. S. & Berriman, M. RATT: Rapid Annotation Transfer Tool. *Nucleic Acids*  
580 *Research* 39, e57–e57 (2011).
- 581 49. Li, H. Minimap2: pairwise alignment for nucleotide sequences. *Bioinformatics* 34, 3094–3100 (2018).
- 582 50. Danecek, P. et al. Twelve years of SAMtools and BCFtools. *GigaScience* 10, giab008 (2021).
- 583 51. Li, H. et al. The Sequence Alignment/Map format and SAMtools. *Bioinformatics* 25, 2078–2079 (2009).
- 584 52. Danecek, P. et al. The variant call format and VCFtools. *Bioinformatics* 27, 2156–2158 (2011).
- 585 53. Waskom, M. seaborn: statistical data visualization. *JOSS* 6, 3021 (2021).
- 586 54. Hunter, J. D. Matplotlib: A 2D Graphics Environment. *Comput. Sci. Eng.* 9, 90–95 (2007).
- 587 55. Adriaenssens, E. & Brister, J. R. How to Name and Classify Your Phage: An Informal Guide. *Viruses* 9, 70 (2017).
- 588 56. Camargo, A. P. et al. IMG/VR v4: an expanded database of uncultivated virus genomes within a framework of  
589 extensive functional, taxonomic, and ecological metadata. *Nucleic Acids Research* 51, D733–D743 (2023).
- 590 57. El-Gebali, S. et al. The Pfam protein families database in 2019. *Nucleic Acids Research* 47, D427–D432 (2019).
- 591 58. Seemann, T. Prokka: rapid prokaryotic genome annotation. *Bioinformatics* 30, 2068–2069 (2014).



- 592 59. Terzian, P. et al. PHROG: families of prokaryotic virus proteins clustered using remote homology. *NAR*  
593 *Genomics and Bioinformatics* 3, lqab067 (2021).
- 594 60. Sievers, F. et al. Fast, scalable generation of high-quality protein multiple sequence alignments using Clustal  
595 Omega. *Mol Syst Biol* 7, 539 (2011).
- 596 61. HMMER. <http://hmmer.org/>.
- 597 62. Gilchrist, C. L. M. & Chooi, Y.-H. clinker & clustermap.js: automatic generation of gene cluster comparison  
598 figures. *Bioinformatics* 37, 2473–2475 (2021).
- 599 63. Wood, D. E., Lu, J. & Langmead, B. Improved metagenomic analysis with Kraken 2. *Genome Biol* 20, 257  
600 (2019).
- 601 64. Integrative Genomics Viewer (IGV): high-performance genomics data visualization and exploration | Briefings in  
602 *Bioinformatics* | Oxford Academic. <https://academic.oup.com/bib/article/14/2/178/208453>.
- 603 65. Minh, B. Q. et al. IQ-TREE 2: New Models and Efficient Methods for Phylogenetic Inference in the Genomic Era.  
604 *Molecular Biology and Evolution* 37, 1530–1534 (2020).
- 605 66. Guindon, S. et al. New Algorithms and Methods to Estimate Maximum-Likelihood Phylogenies: Assessing the  
606 Performance of PhyML 3.0. *Systematic Biology* 59, 307–321 (2010).
- 607 67. Letunic, I. & Bork, P. Interactive Tree Of Life (iTOL) v5: an online tool for phylogenetic tree display and  
608 annotation. *Nucleic Acids Research* 49, W293–W296 (2021).
