# Supplementary material for: Diverse and abundant phages exploit conjugative plasmids
Source: bioRxiv or medRxiv preprint supplement (doi:10.1101/2023.03.19.532758), 2023-12-21
Supplement: Supplementary file [file media-1.pdf]

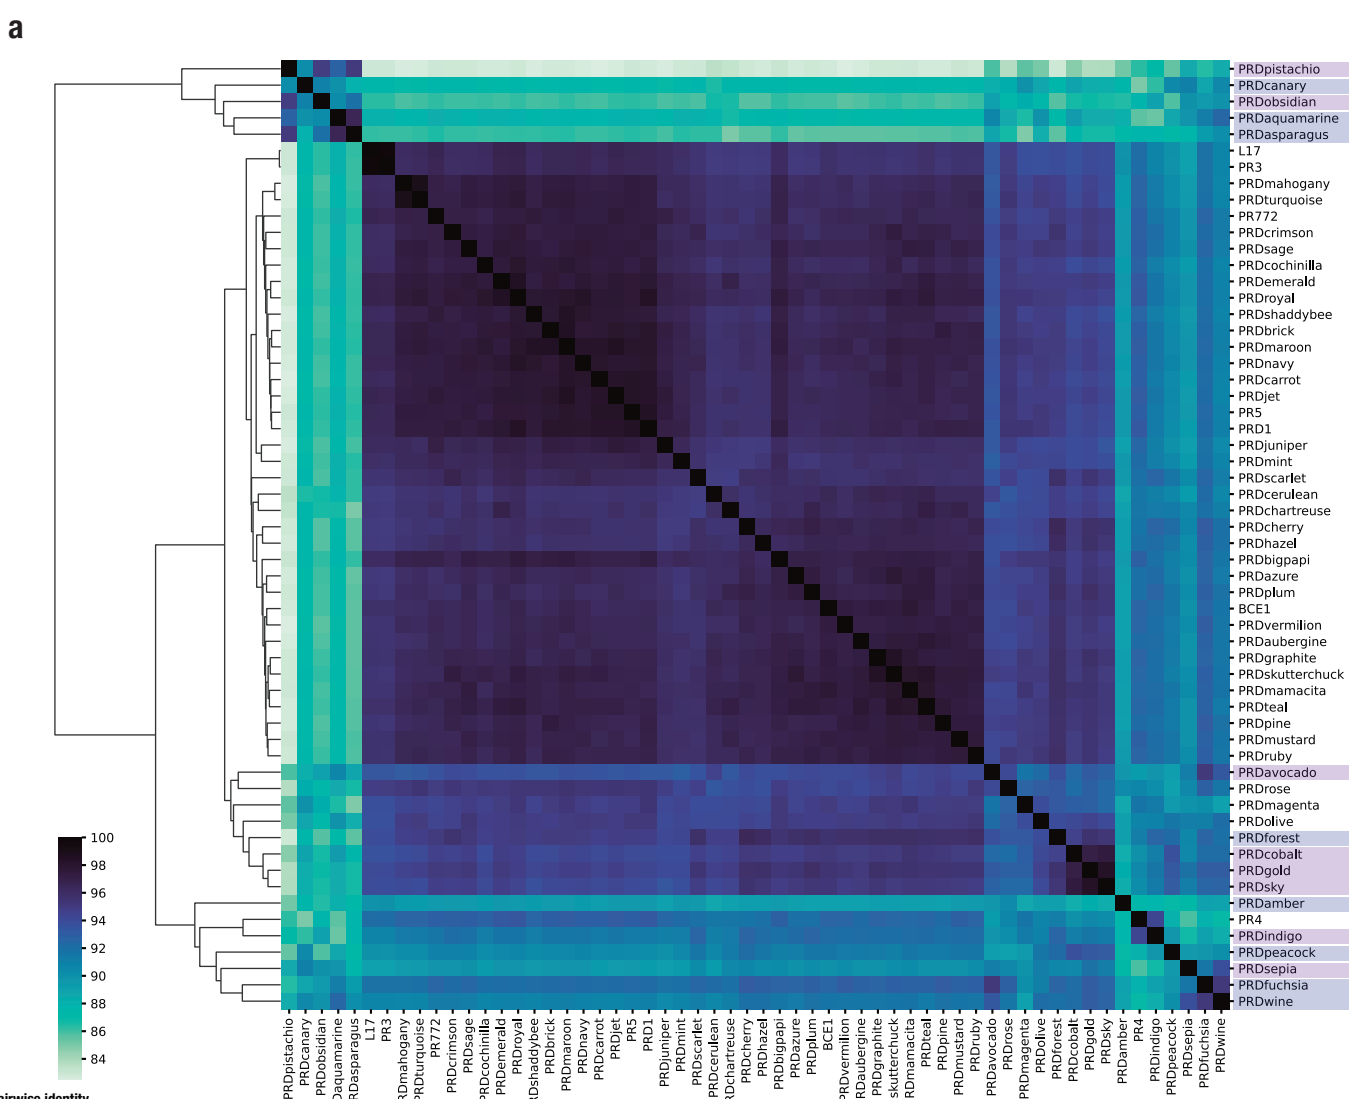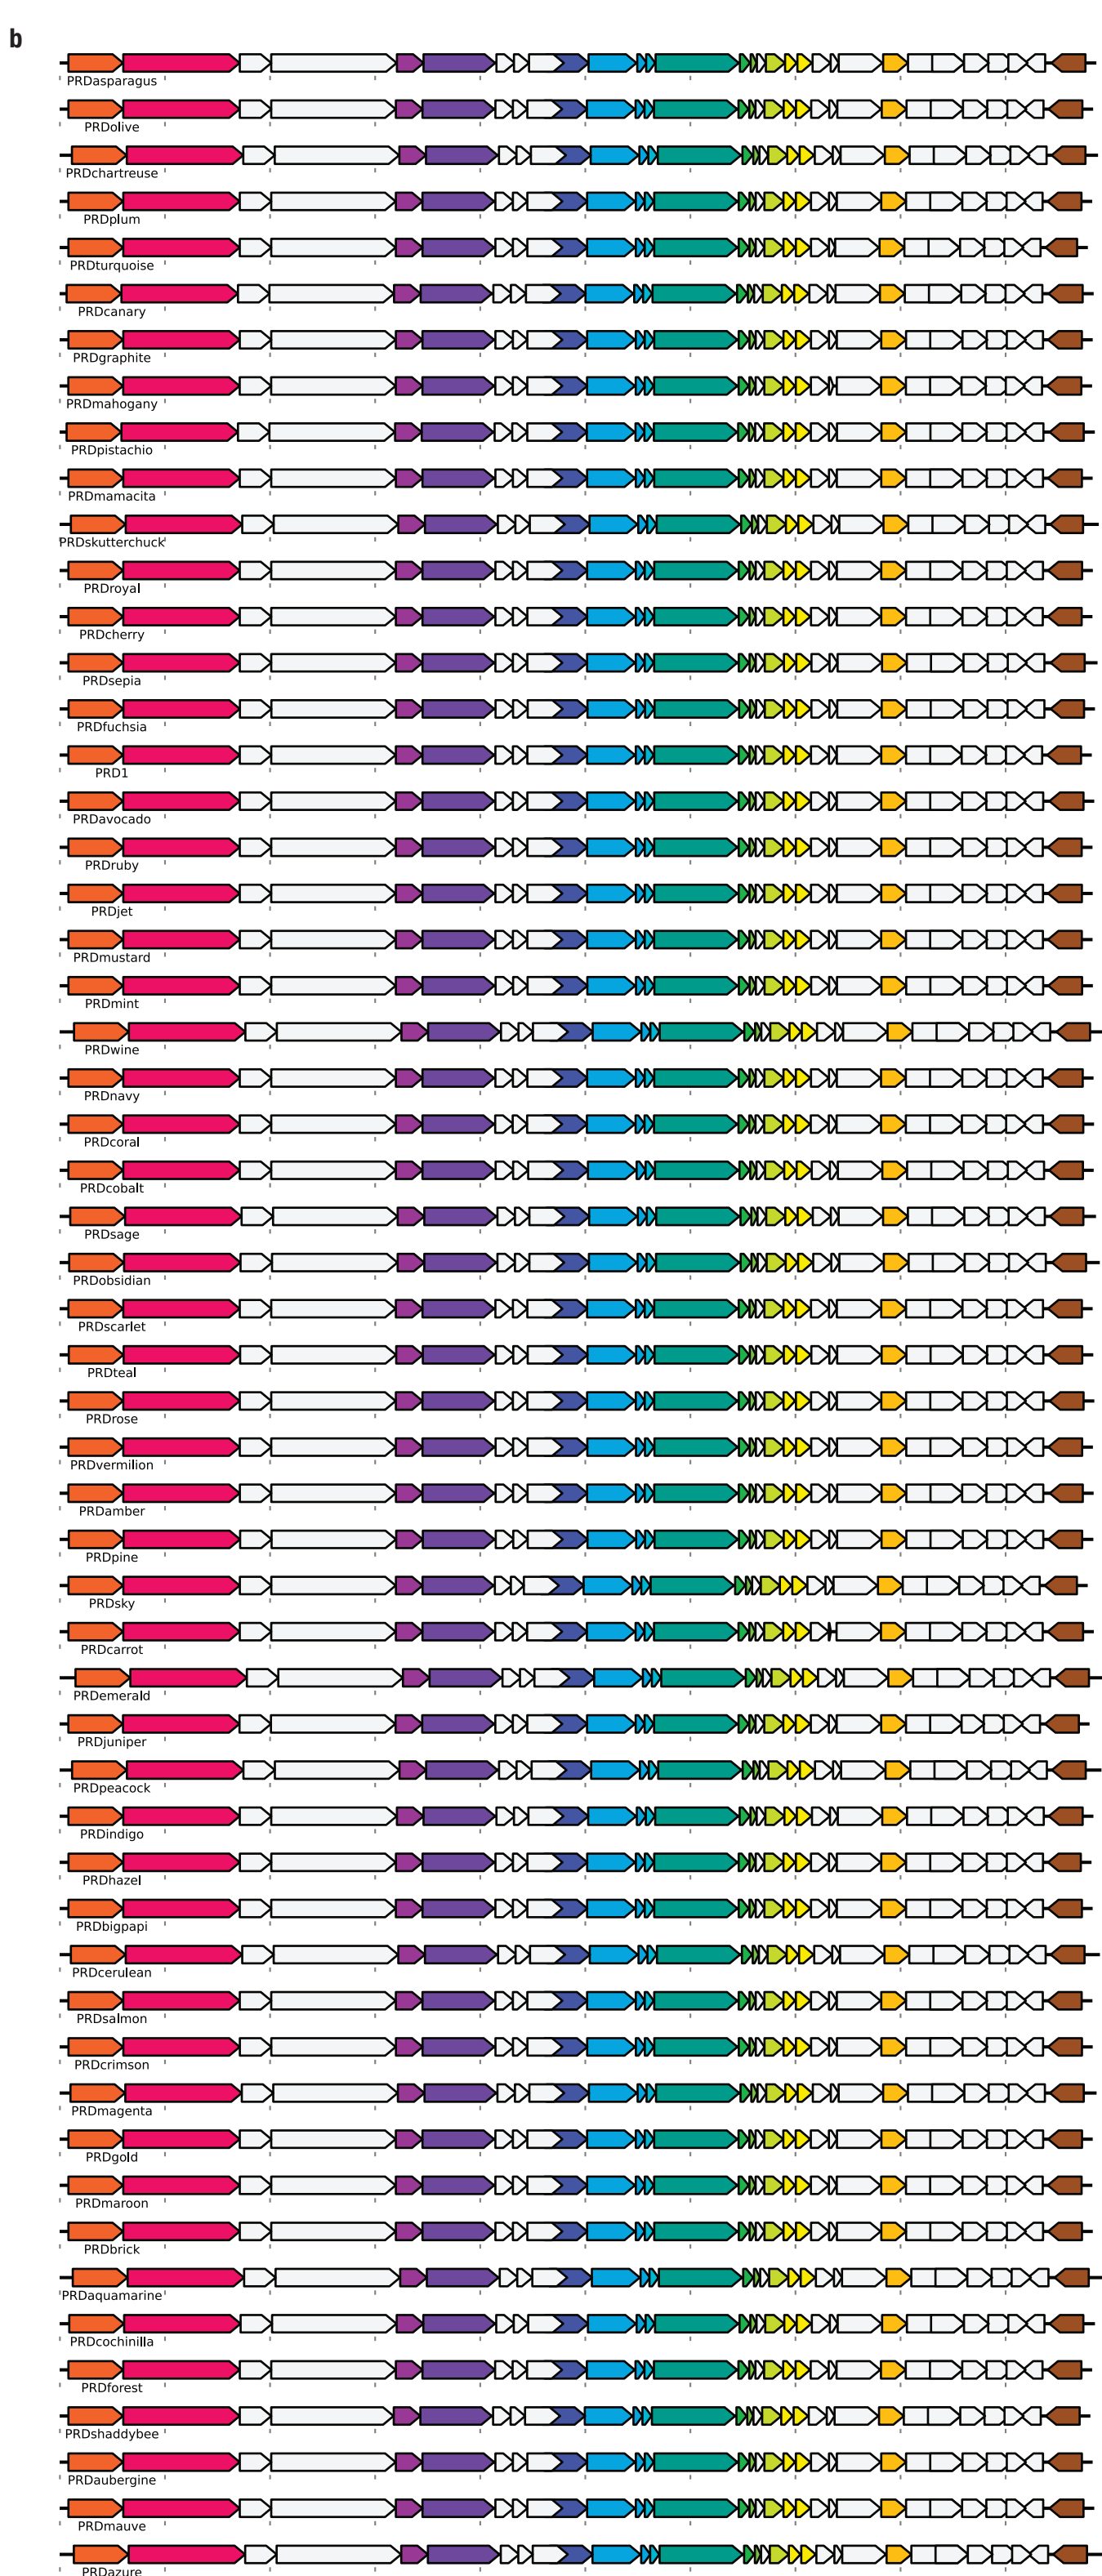

**Figure S1 | Alphatectiviruses have no variation in gene content, but contain a large number of single nucleotide polymorphisms. a**, Whole-genome pairwise nucleotide identity matrix comparing all known alphatectiviruses. Highlighted isolates represent proposed new species. **b**, Gene map comparison of all alphatectiviruses isolated in this study, colors are as in (Figure 4b)
